# Supplementary material for: From Genes to Milk: Genomic Organization and Epigenetic Regulation of the Mammary Transcriptome
Source: PubMed Central journal article supplement (PMC3784412; doi:10.1371/journal.pone.0075030), 2013-09-26

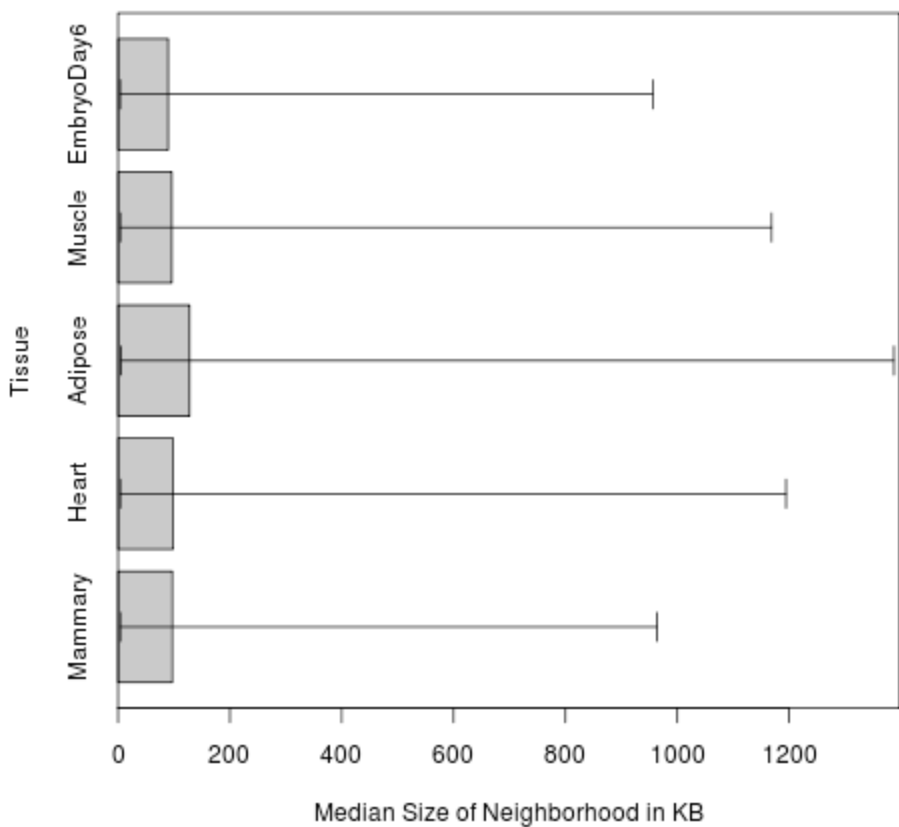

Supplement: pone.0075030.s003.pdf [file pone.0075030.s003.pdf]
